# Supplementary material
Source: PubMed Central journal article supplement (PMC3564227)
Supplement: NIHMS429387-supplement-supplement_1.pdf [file NIHMS429387-supplement-supplement_1.pdf]

eFigure 1. IVR Flow Diagram. Participants answer yes/no to whether they experienced symptoms since the prior call. If they answer “yes”, they are asked to rank symptom severity on a 1-9 scale.

eTable 1. Homogeneity testing: Treatment Effect Mean Difference (Mexiletine – Placebo) with 95% Confidence Interval .

Type of file: figure

Label: eFigure 1

Filename: eFigure1\_082712.docx

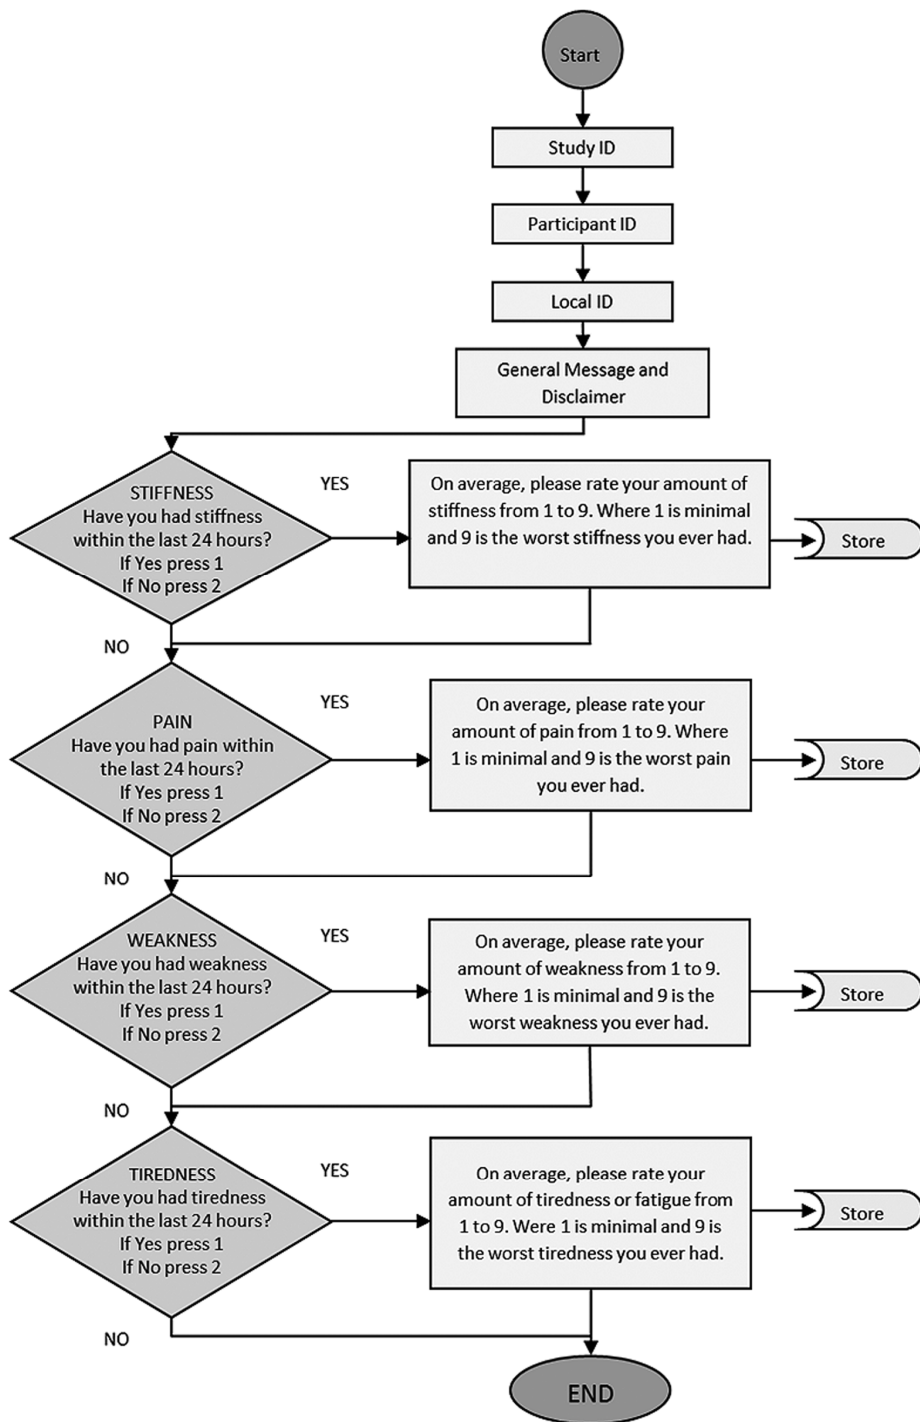

eFigure 1. IVR Flow Diagram. Participants answer yes/no to whether they experienced symptoms since the prior call. If they answer “yes”, they are asked to rank symptom severity on a 1-9 scale.

Type of file: table

Label: Table R2

Filename: eTableR2\_082712.docx

**eTable 1. Homogeneity testing: Treatment Effect Mean Difference (Mexiletine – Placebo) with 95% Confidence Interval.**

| Endpoint                                             | Overall Treatment Effect Estimate* | Treatment Effect within Chloride† | Treatment Effect within Sodium‡ | Treatment Effect within No Identified Mutation⋈ | Homogeneity Test |
|------------------------------------------------------|------------------------------------|-----------------------------------|---------------------------------|-------------------------------------------------|------------------|
| <b>IVR—Stiffness – period 1§</b>                     | -1.69 (-2.66, -0.723)              | -1.67 (-2.73, -0.614)             | -2.11 (-3.28, -0.933)           | 1.37 (-3.48, 6.22)                              | 0.003            |
| <b>IVR—Stiffness – period 2§</b>                     | -3.67 (-4.66, -2.68)               | -4.18 (-5.25, -3.12)              | -2.67 (-3.84, -1.51)            | -2.57 (-4.50, -0.633)                           | 0.003            |
| <b>IVR—Pain</b>                                      | -1.63 (-1.99, -1.26)               | -1.55 (-2.04, -1.06)              | -1.91 (-2.48, -1.34)            | 0.0507 (-1.64, 1.74)                            | 0.08             |
| <b>IVR—Weakness</b>                                  | -1.26 (-1.67, -0.857)              | -1.10 (-1.65, -0.550)             | -1.44 (-2.08, -0.804)           | -1.63 (-3.46, 0.196)                            | 0.66             |
| <b>IVR—Tiredness</b>                                 | -0.916 (-1.30, -0.528)             | -1.21 (-1.70, -0.709)             | -0.494 (-1.12, 0.128)           | -0.316 (-2.92, 2.29)                            | 0.18             |
| <b>SF36 – Physical Component</b>                     | 5.57 (3.41, 7.72)                  | 6.05 (3.34, 8.75)                 | 5.47 (2.02, 8.92)               | -6.83 (-21.4, 7.7)                              | 0.2              |
| <b>SF36 – Mental Component</b>                       | 4.91 (2.30, 7.53)                  | 5.85 (2.53, 9.18)                 | 3.88 (-0.352, 8.12)             | -3.92 (-21.5, 13.7)                             | 0.44             |
| <b>INQoL – QOL</b>                                   | -2.69 (-4.09, -1.29)               | -3.11 (-4.89, -1.34)              | -2.28 (-4.55, -0.0124)          | -                                               | 0.26             |
| <b>Clinical assessment – eye closure (seconds) €</b> | -0.796 (-1.15, -0.438)             | -0.751 (-1.22, -0.285)            | -0.856 (-1.45, -0.263)          | -1.04 (-3.48, 1.41)                             | 0.94             |
| <b>Clinical assessment – hand grip (seconds) €</b>   | -0.851 (-1.28, -0.424)             | -1.24 (-1.77, -0.711)             | -0.355 (-1.03, 0.316)           | 1.06 (-1.61, 3.73)                              | 0.04             |

\* treatment effect estimate from model when adjusting for period and mutation class

†chloride channel mutations n=34

‡ sodium channel mutations n=21

⋈ No identified mutation n=4

§ Primary endpoint

€ estimates are on the  $\log(t + 0.1)$  scale

¥ The significance level of the combined homogeneity test was 0.007 i.e., including both sets of treatment-specific mutation class interaction terms in the model
